# Supplementary material for: FCER2 T2206C variant associated with FENO levels in asthmatic children using inhaled corticosteroids: The PACMAN study
Source: PubMed Central journal article supplement — Clin Exp Allergy. 2019 Aug 26;49(11):1429–36. doi: 10.1111/cea.13460 (PMC6899548; doi:10.1111/cea.13460), 2019-08-26
Supplement: CEA-49-1429-s001.pdf [file CEA-49-1429-s001.pdf]

## Supplementary Materials:

### *FCER2* T2206C variant associated with FENO levels in asthmatic children using inhaled corticosteroids: The PACMAN study

Leila Karimi<sup>1</sup>, Susanne J. H. Vijverberg<sup>2,3,4</sup>, Niloufar Farzan<sup>2,3</sup>, Mohsen Ghanbari<sup>5,6</sup>, Katia M.C. Verhamme<sup>1,7</sup>, Anke H. Maitland-van der Zee<sup>2,3,4\*</sup>

<sup>1</sup>Department of Medical Informatics, Erasmus University Medical Centre, Rotterdam, the Netherlands

<sup>2</sup> Department of Respiratory Medicine, Amsterdam University Medical Centers, University of Amsterdam, Amsterdam, the Netherlands

<sup>3</sup> Division of Pharmacoepidemiology and Clinical Pharmacology, Utrecht Institute for Pharmaceutical Sciences (UIPS), Faculty of Science, Utrecht University, Utrecht, the Netherlands

<sup>4</sup>Department of Pediatric Respiratory Medicine, Emma Children's Hospital, Amsterdam University Medical Centers, University of Amsterdam, Amsterdam, the Netherlands

<sup>5</sup>Department of Epidemiology, Erasmus University Medical Centre, Rotterdam, the Netherlands

<sup>6</sup>Department of Genetics, School of Medicine, Mashhad University of Medical Science, Mashhad, Iran

<sup>7</sup>Department of Bioanalysis, Ghent University, Ghent, Belgium

\*Correspondence:

Prof. Dr. Anke-Hilse Maitland-van der Zee,

Prof. Precision Medicine in Respiratory Disease, Department of Respiratory Medicine, Amsterdam University Medical Centers, University of Amsterdam

PO Box 22660, 1100 DD Amsterdam, Meibergdreef 9, Amsterdam, the Netherlands

Tel. +31 (20) 5668137

E-mail: a.h.maitland@amsterdamumc.nl

## Contents:

|                                                                                                                                                                                                                |    |
|----------------------------------------------------------------------------------------------------------------------------------------------------------------------------------------------------------------|----|
| Table S1: Low, medium and high daily doses of inhaled corticosteroids .....                                                                                                                                    | 3  |
| Table S2: Regression coefficients and 95% confidence intervals describing the association between rs28364072 variation of the <i>FCER2</i> gene (per copy of the G allele) and the concentration of FENO. .... | 4  |
| Table S3: Functional annotation of rs28364072 using the HaploRegv4.1. ....                                                                                                                                     | 5  |
| Table S4: The effect of rs28364072 on <i>FCER2</i> gene expression (using GETX portal, <a href="http://www.gtexportal.org/home/">http://www.gtexportal.org/home/</a> ). ....                                   | 7  |
| Figure S1: The genotypes of rs28364072 in GTEx Whole Blood. ....                                                                                                                                               | 8  |
| Figure S2: <i>FCER2</i> expression by rs28364072 in different tissues (using GTEx portal). ....                                                                                                                | 9  |
| Figure S3: CD23 and NO production. ....                                                                                                                                                                        | 10 |

**Table S1:** Low, medium and high daily doses of inhaled corticosteroids<sup>1</sup>

| <b>Drug</b>                 | <b>Low</b> | <b>Medium</b> | <b>High</b> |
|-----------------------------|------------|---------------|-------------|
| 12 years and older          |            |               |             |
| Budesonide Daily dose (mcg) | 200-400    | >400-800      | >800        |
| Younger than 12 years       |            |               |             |
| Budesonide Daily dose (mcg) | 100-200    | >200-400      | >400        |

**Table S2:** Regression coefficients and 95% confidence intervals describing the association between rs28364072 variation of the *FCER2* gene (per copy of the G allele) and the concentration of FENO.

| Outcome           | n   | Effect allele | Crude   |                | Model 1 |         | Model 2        |              |         |                |              |
|-------------------|-----|---------------|---------|----------------|---------|---------|----------------|--------------|---------|----------------|--------------|
|                   |     |               | $\beta$ | (95% CI)       | P       | $\beta$ | (95% CI)       | P            | $\beta$ | (95% CI)       | P            |
| FENO*             | 593 | G             | -0.16   | (-0.27, -0.04) | 0.008   | -0.12   | (-0.23, -0.01) | <b>0.030</b> | -0.12   | (-0.23, -0.01) | <b>0.033</b> |
| FENO <sup>#</sup> | 593 | G             | -0.15   | (-0.25, -0.04) | 0.005   | -0.12   | (-0.21, -0.02) | <b>0.019</b> | -0.12   | (-0.22, -0.02) | <b>0.014</b> |

FENO, Fractional exhaled Nitric Oxide; CI: Confidence Interval.

FENO levels were used as log-transformed (ln).

\*The FENO values equals to zero ppb were set at zero ppb.

# The FENO values equals to zero ppb were set at 5 ppb.

Crude, Only SNP

Model 1, Adjusted for age and sex

Model 2, Model 1 further adjusted for (adapted) British Thoracic Society (BTS) treatment steps and atopy

**Table S3:** Functional annotation of rs28364072 using the HaploRegv4.1.

| chr | pos (hg38) | LD (r <sup>2</sup> ) | LD (D') | variant     | Ref | Alt | EUR freq | Enhancer histone marks | DNase       | Motifs changed     | Selected eQTL hits | GENCODE genes / dbSNP func annot |
|-----|------------|----------------------|---------|-------------|-----|-----|----------|------------------------|-------------|--------------------|--------------------|----------------------------------|
| 19  | 7687177    | 0.82                 | 0.99    | rs1078625   | A   | G   | 0.32     |                        | BLD         | 11 altered motifs  | 4 hits             | 1.6kb 3' of FCER2                |
| 19  | 7689659    | 0.84                 | 1       | rs62110713  | C   | T   | 0.25     | BLD                    |             | EBF                |                    | FCER2/ intronic                  |
| 19  | 7689705    | 0.99                 | 1       | rs62110714  | C   | T   | 0.28     | BLD                    |             | 8 altered motifs   |                    | FCER2/ intronic                  |
| 19  | 7689743    | 1                    | 1       | rs62110715  | T   | C   | 0.28     | BLD                    | BLD         | Ik-1,LUN-1         |                    | FCER2/ intronic                  |
| 19  | 7689790    | 0.99                 | 1       | rs113483829 | C   | T   | 0.28     | BLD                    | BLD,BLD     | 4 altered motifs   |                    | FCER2/ intronic                  |
| 19  | 7689810    | 0.99                 | 1       | rs111674746 | G   | C   | 0.28     | BLD                    | BLD,BLD     |                    |                    | FCER2/ intronic                  |
| 19  | 7689816    | 0.99                 | 1       | rs113453074 | G   | T   | 0.28     | BLD                    | BLD         | 5 altered motifs   |                    | FCER2/ intronic                  |
| 19  | 7689819    | 0.99                 | 1       | rs111740138 | A   | G   | 0.28     | BLD                    | BLD         | 4 altered motifs   |                    | FCER2/ intronic                  |
| 19  | 7689880    | 1                    | 1       | rs35260294  | C   | T   | 0.28     | BLD                    | IPSC        | NRSF               |                    | FCER2/ intronic                  |
| 19  | 7689912    | 1                    | 1       | rs34288384  | G   | A   | 0.28     | BLD                    | IPSC        | ERalpha-a,Hic1,SP1 |                    | FCER2/ intronic                  |
| 19  | 7690026    | 0.97                 | 1       | rs4996980   | G   | A   | 0.29     | BLD, HRT               |             | Rad21,Whn          |                    | FCER2/ intronic                  |
| 19  | 7690031    | 0.97                 | 1       | rs4996979   | T   | C   | 0.29     | BLD, HRT               |             | 4 altered motifs   |                    | FCER2/ intronic                  |
| 19  | 7690056    | 0.97                 | 1       | rs4996978   | A   | C   | 0.29     | BLD, HRT               |             | 4 altered motifs   |                    | FCER2/ intronic                  |
| 19  | 7690078    | 0.97                 | 1       | rs4996977   | T   | C   | 0.29     | BLD, HRT               |             | PU.1               |                    | FCER2/ intronic                  |
| 19  | 7690082    | 0.97                 | 1       | rs4996976   | A   | G   | 0.29     | BLD, HRT               |             | 4 altered motifs   |                    | FCER2/ intronic                  |
| 19  | 7690085    | 0.97                 | 1       | rs4996975   | C   | T   | 0.29     | BLD, HRT               | IPSC        | AFP1,SIX5          |                    | FCER2/ intronic                  |
| 19  | 7690170    | 1                    | 1       | rs2228138   | G   | A   | 0.28     | BLD                    | ESC         | 5 altered motifs   |                    | FCER2/ synonymous                |
| 19  | 7690273    | 1                    | 1       | rs4996973   | A   | G   | 0.28     | BLD                    | 4 tissues   | 7 altered motifs   |                    | FCER2/ intronic                  |
| 19  | 7690327    | 1                    | 1       | rs4996972   | C   | T   | 0.28     | BLD, SPLN              | 4 tissues   |                    |                    | FCER2/ intronic                  |
| 19  | 7690399    | 1                    | 1       | rs28364072  | A   | G   | 0.28     | BLD, SPLN              |             | 10 altered motifs  |                    | FCER2/ intronic                  |
| 19  | 7690583    | 0.99                 | 1       | rs2277995   | T   | C   | 0.28     | BLD, SPLN              | BLD,BLD     | 25 altered motifs  |                    | FCER2/ intronic                  |
| 19  | 7690586    | 0.99                 | 1       | rs74927160  | G   | T   | 0.28     | BLD, SPLN              | BLD,BLD     | 16 altered motifs  |                    | FCER2/intronic                   |
| 19  | 7690599    | 0.87                 | 1       | rs76013233  | G   | A   | 0.26     | BLD, SPLN              | BLD,BLD     | AP-2,SP1           |                    | FCER2/ intronic                  |
| 19  | 7690632    | 1                    | 1       | rs2277994   | A   | C,G | 0.28     | BLD, SPLN              | BLD,BLD     |                    |                    | FCER2/ intronic                  |
| 19  | 7690685    | 1                    | 1       | rs2277993   | G   | A   | 0.28     | BLD, SPLN              | BLD,BLD     | AP-2               |                    | FCER2/ intronic                  |
| 19  | 7690696    | 1                    | 1       | rs2277992   | A   | G   | 0.28     | BLD, SPLN              | BLD,BLD,BLD | Smad               |                    | FCER2/ intronic                  |

**Table S3:** Functional annotation of rs28364072 using the HaploRegv4.1 (cont'd).

| chr | pos (hg38) | LD (r <sup>2</sup> ) | LD (D') | variant    | Ref | Alt | EUR freq | Enhancer histone marks | DNase        | Motifs changed    | Selected eQTL hits | GENCODE genes / dbSNP func annot |
|-----|------------|----------------------|---------|------------|-----|-----|----------|------------------------|--------------|-------------------|--------------------|----------------------------------|
| 19  | 7690830    | 1                    | 1       | rs2277991  | A   | G   | 0.28     | BLD, SPLN              | 4 tissues    | Maf,RREB-1        | 4 hits             | FCER2/ intronic                  |
| 19  | 7690859    | 1                    | 1       | rs2277990  | A   | G   | 0.28     | BLD, SPLN              | 5 tissues    | BCL,ELF1,Ets      |                    | FCER2/ intronic                  |
| 19  | 7691182    | 1                    | 1       | rs73489945 | G   | A   | 0.28     | BLD, SPLN              | BLD,BLD,BLD  | Myb,NRSF,Pax-4    |                    | FCER2/ intronic                  |
| 19  | 7691202    | 1                    | 1       | rs66508756 | T   | C   | 0.28     | BLD, SPLN              | 5 tissues    | 4 altered motifs  |                    | FCER2/ intronic                  |
| 19  | 7691237    | 1                    | 1       | rs68063051 | T   | C   | 0.28     | BLD, SPLN              | 5 tissues    |                   |                    | FCER2/ intronic                  |
| 19  | 7691305    | 1                    | 1       | rs67614954 | C   | T   | 0.28     | BLD, SPLN              | 4 tissues    |                   |                    | FCER2/ intronic                  |
| 19  | 7691385    | 1                    | 1       | rs62110718 | A   | T   | 0.28     | BLD, SPLN              | 4 tissues    |                   |                    | FCER2/ intronic                  |
| 19  | 7691425    | 1                    | 1       | rs62110719 | C   | T   | 0.28     | BLD, SPLN              | BLD,BLD,BLD  | HNF1,Pbx-1        |                    | FCER2/ intronic                  |
| 19  | 7691577    | 1                    | 1       | rs72998478 | A   | G   | 0.28     | BLD                    | 4 tissues    | HDAC2,ZBRK1       |                    | FCER2/ intronic                  |
| 19  | 7691591    | 1                    | 1       | rs66527560 | C   | G   | 0.28     | BLD                    | 4 tissues    | 5 altered motifs  |                    | FCER2/ intronic                  |
| 19  | 7691709    | 0.93                 | 0.97    | rs62110724 | G   | A   | 0.28     | BLD                    | 4 tissues    | LBP-1,Tgif1       |                    | FCER2/ intronic                  |
| 19  | 7691748    | 0.96                 | 0.99    | rs62110725 | A   | C   | 0.29     | BLD, OVRY              | 4 tissues    | Ets,Mef2,RREB-1   |                    | FCER2/ intronic                  |
| 19  | 7691771    | 0.99                 | 1       | rs62110726 | T   | C   | 0.28     | BLD, OVRY              | 6 tissues    | 9 altered motifs  |                    | FCER2/ intronic                  |
| 19  | 7691820    | 0.99                 | 1       | rs62110727 | T   | C   | 0.28     | BLD, OVRY              | 4 tissues    | COMP1,Myc         |                    | FCER2/ intronic                  |
| 19  | 7692781    | 0.99                 | 1       | rs17159834 | A   | G   | 0.28     | BLD, GI, SPLN          | BLD,BLD,BLD  | 7 altered motifs  | 4 hits             | FCER2/ intronic                  |
| 19  | 7692842    | 0.99                 | 1       | rs62110730 | C   | T   | 0.28     | BLD, GI, SPLN          | 5 tissues    | HIF1              |                    | FCER2/ intronic                  |
| 19  | 7692867    | 0.99                 | 1       | rs62110731 | C   | A   | 0.28     | BLD, GI, SPLN          | 5 tissues    | Pou2f2,Pou5f1     |                    | FCER2/ intronic                  |
| 19  | 7692883    | 0.99                 | 1       | rs62110732 | A   | G   | 0.28     | BLD, GI, SPLN          | 6 tissues    | Foxp3             |                    | FCER2/ intronic                  |
| 19  | 7693114    | 0.99                 | 1       | rs17159838 | G   | A   | 0.28     | 4 tissues              | 5 tissues    | RREB-1            |                    | FCER2/ intronic                  |
| 19  | 7693231    | 0.98                 | 1       | rs34613454 | G   | C   | 0.28     | ESDR, BLD, GI          | BLD,BLD      | 6 altered motifs  |                    | FCER2/ intronic                  |
| 19  | 7698025    | 0.83                 | 1       | rs7249360  | G   | A   | 0.25     | 5 tissues              | IPSC,BLD     | 4 altered motifs  | 4 hits             | FCER2/ intronic                  |
| 19  | 7698159    | 0.8                  | 0.99    | rs7249320  | C   | A   | 0.24     | ESC, IPSC, BLD         | ESC,IPSC,BLD | 10 altered motifs | 4 hits             | FCER2/ intronic                  |

**Pos**, position; **LD**, Linkage disequilibrium; **ref**, reference; **Alt**, alternative; **EUR freq**, European frequency; **eQTL**, expression quantitative trait loci; **func annot**, Functional annotation.

**Table S4:** The effect of rs28364072 on *FCER2* gene expression (using GETX portal, <http://www.gtexportal.org/home/>).

| Gene Symbol  | Variant Id         | SNP Id     | P-Value  | Normalized effect size | Tissue      |
|--------------|--------------------|------------|----------|------------------------|-------------|
| <i>FCER2</i> | 19_7755285_A_G_b37 | rs28364072 | 1.30E-05 | -0.16                  | Whole Blood |

**Figure S1:** The genotypes of rs28364072 in GTEx Whole Blood. GTEx portal, <http://www.gtexportal.org/home/>

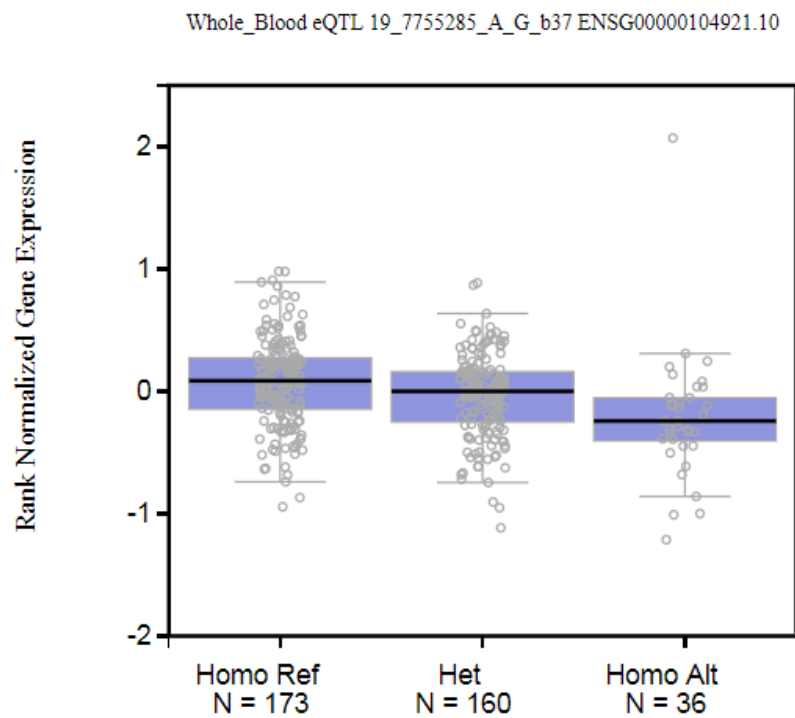

This figure is extracted from the GTEx portal. The legend on the top of the figure includes information on; tissue, analysis, chromosome\_position\_reference allele\_effect allele\_build and gene ID (GPR126).



**Figure S2:** *FCER2* expression by rs28364072 in different tissues (using GTEx portal).

[www.gtexportal.org/home/](http://www.gtexportal.org/home/)

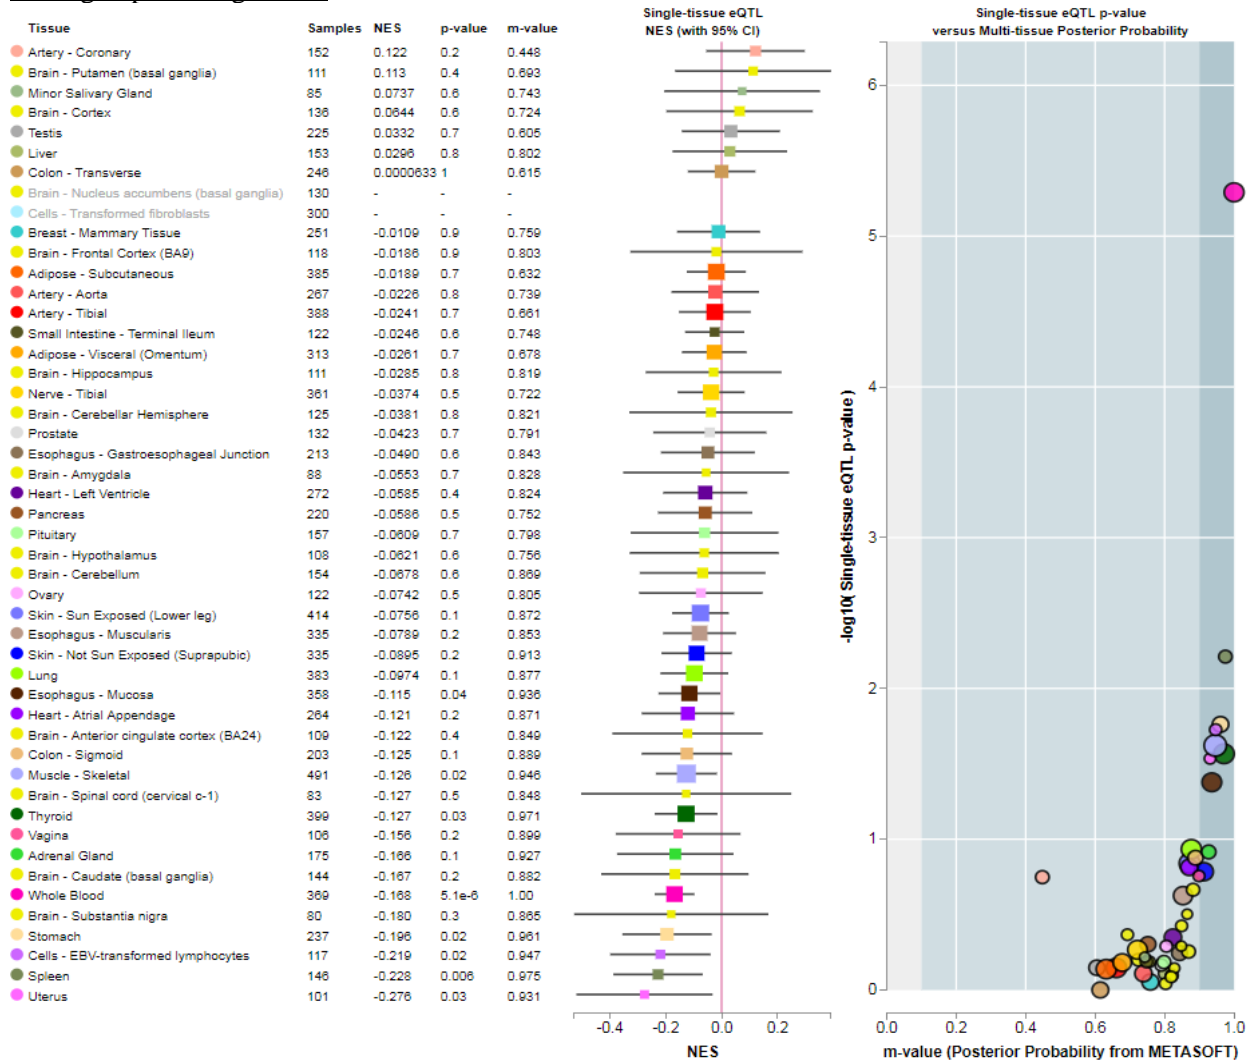

ENSG0000104921.10 *FCER2* and 19\_7755159\_A\_G\_b37 eQTL (Meta - Analysis RE2 P-Value: 1.91618e-11)

**NOTE:** using GTEx portal, <http://www.gtexportal.org/home/>

“**NES** :The slope of the linear regression of normalized expression data versus the three genotype categories using single-tissue eQTL analysis, representing eQTL effect size. The normalized expression values are based on quantile normalization within each tissue, followed by inverse quantile normalization for each gene across samples.

**p-value:** From a t-test that compares observed beta from single-tissue eQTL analysis to a null beta of 0.

**m-value:** The posterior probability that an eQTL effect exists in each tissue tested in the cross-tissue meta-analysis. The m-value ranges between 0 and 1 (Han and Eskin, PLoS Genetics 8(3): e1002555, 2012),

m-value interpretation:

Small m-value (e.g. <0.1); The tissue is predicted to NOT have an eQTL effect. Large m-value (e.g. >0.9); The tissue is predicted to HAVE an eQTL effect. Otherwise; The prediction of the existence of an eQTL effect is ambiguous.”<sup>2</sup>

**Figure S3: CD23 and NO production.**<sup>3</sup>

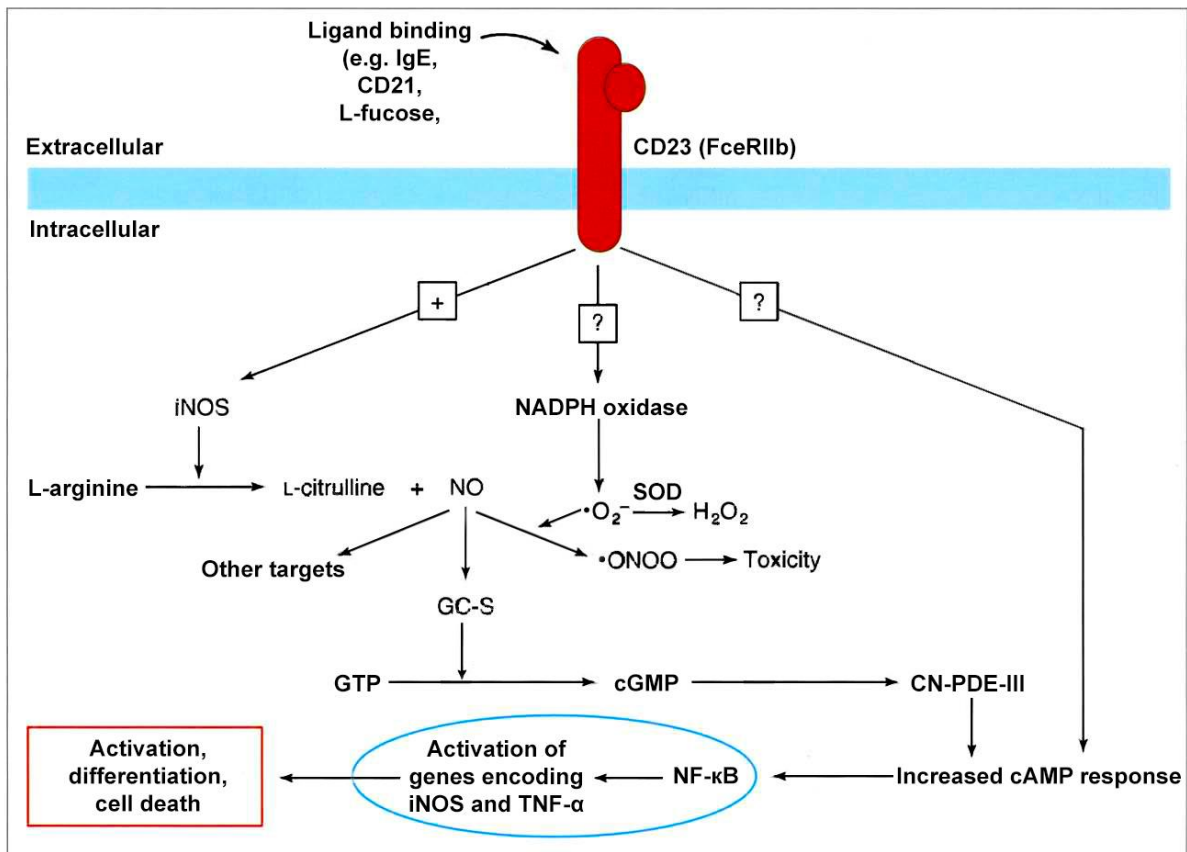

**Note:** "Proposed sequence of events following the ligation of CD23 at the surface of monocytes. CD23 engagement, elicited through interaction with one of its multiple ligands, induces stimulation of the NOS and NADPH oxidase pathways".<sup>3</sup>

## Supplemental references:

1. Global Initiative for Asthma (GINA) for Asthma Management and Prevention, 2018.  
*Available from: <http://www.ginasthma.org/>. 2018.*
2. GTEEx portal. [www.gtexportal.org/home/](http://www.gtexportal.org/home/).
3. Dugas B, Mossalayi MD, Damais C, Kolb JP. Nitric oxide production by human monocytes: evidence for a role of CD23. *Immunology today*. 1995; 16: 574-580.
